# Supplementary material for: Para-Substituted Thiosemicarbazones as Cholinesterase Inhibitors: Synthesis, In Vitro Biological Evaluation, and In Silico Study
Source: PubMed Central journal article supplement — ACS Omega. 2023 Jan 25;8(5):5116–23. doi: 10.1021/acsomega.2c08108 (PMC9910069; doi:10.1021/acsomega.2c08108), 2023-01-25
Supplement: ao2c08108_si_001.pdf [file ao2c08108_si_001.pdf]

**Para Substituted Thiosemicarbazones as Cholinesterase Inhibitors: Synthesis, *In vitro*  
Biological Evaluation and *In silico* Study**

Momin Khan<sup>1\*</sup>, Hina Gohar<sup>1</sup>, Aftab Alam<sup>2</sup>, Abdul Wadood<sup>3</sup>, Azam Shareef<sup>3</sup>, Mahboob Ali<sup>1</sup>,  
Asaad Khalid<sup>4,5</sup>, Ashraf N. Abdalla<sup>6</sup>, Farhat Ullah<sup>7</sup>

<sup>1</sup>*Department of Chemistry, Abdul Wali Khan University, Mardan-23200, Pakistan; Phone:*  
*+92937929122; <https://orcid.org/0000-0003-0936-5025>; Email: [mominkhan@awkum.edu.pk](mailto:mominkhan@awkum.edu.pk)*

<sup>1</sup>*Department of Chemistry, Abdul Wali Khan University, Mardan-23200, Pakistan;*  
*([guriashah93@gmail.com](mailto:guriashah93@gmail.com))*

<sup>2</sup>*Department of Chemistry, University of Malakand, Chakdara, Lower Dir 18800, Pakistan;*  
*<https://orcid.org/0000-0003-0475-2376>; Email: [aaswat117@gmail.com](mailto:aaswat117@gmail.com)*

<sup>3</sup>*Department of Biochemistry, Abdul Wali Khan University, Mardan-23200, Pakistan;*  
*([awadood@awkum.edu.pk](mailto:awadood@awkum.edu.pk))*

<sup>3</sup>*Department of Biochemistry, Abdul Wali Khan University, Mardan-23200, Pakistan;*  
*([azamshareef46@gmail.com](mailto:azamshareef46@gmail.com))*

<sup>1</sup>*Department of Chemistry, Abdul Wali Khan University, Mardan-23200, Pakistan;*  
*([mehboobchem@gmail.com](mailto:mehboobchem@gmail.com)),*

<sup>4</sup>*Substance Abuse and Toxicology Research Center, Jazan University, P.O. Box: 114, Jazan*  
*45142, Saudi Arabia; ([akahmed@jazanu.edu.sa](mailto:akahmed@jazanu.edu.sa))*

<sup>5</sup>*Medicinal and Aromatic Plants and Traditional Medicine Research Institute, National Center*  
*for Research, P. O. Box 2404, Khartoum, Sudan; ([akahmed@jazanu.edu.sa](mailto:akahmed@jazanu.edu.sa))*

<sup>6</sup>*Department of Pharmacology and Toxicology, College of Pharmacy, Umm Al-Qura University,*  
*Makkah 21955, Saudi Arabia; ([anabdrabo@uqu.edu.sa](mailto:anabdrabo@uqu.edu.sa))*

<sup>7</sup>Department of Pharmacy, University of Malakand, Chakdara, Dir Lower, Khyber Pakhtunkhwa  
18800, Pakistan; ([farhataziz80@hotmail.com](mailto:farhataziz80@hotmail.com))

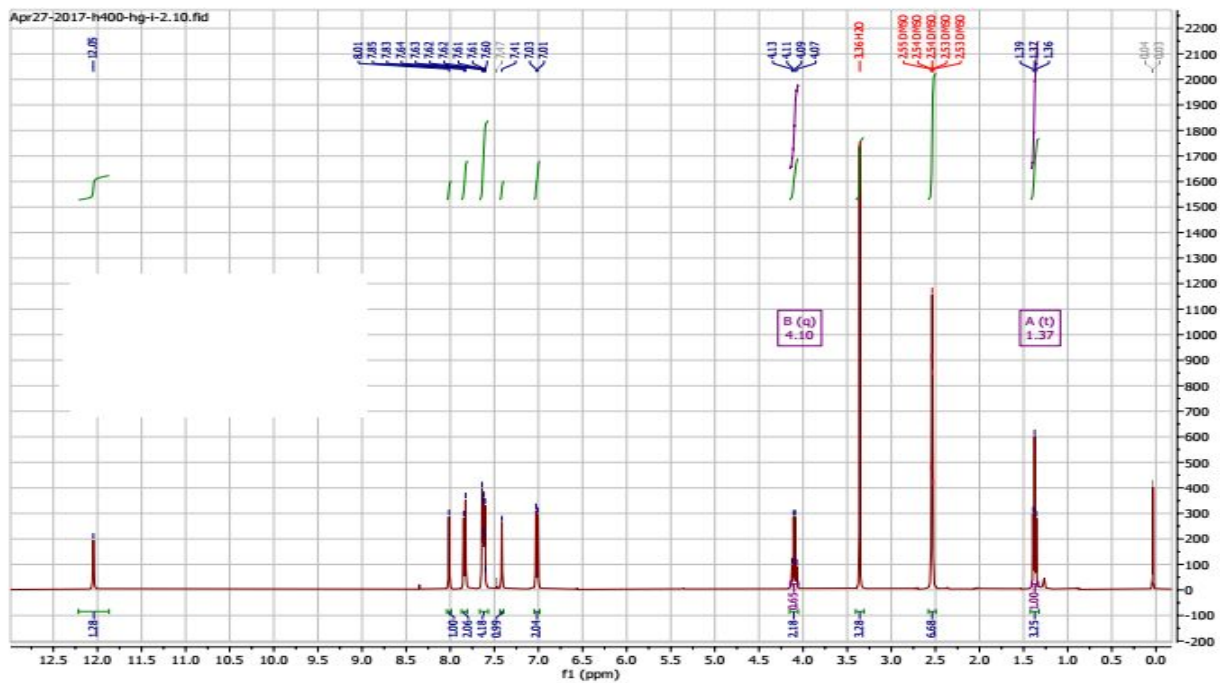

Figure-S1: <sup>1</sup>H-NMR spectra of compound 5

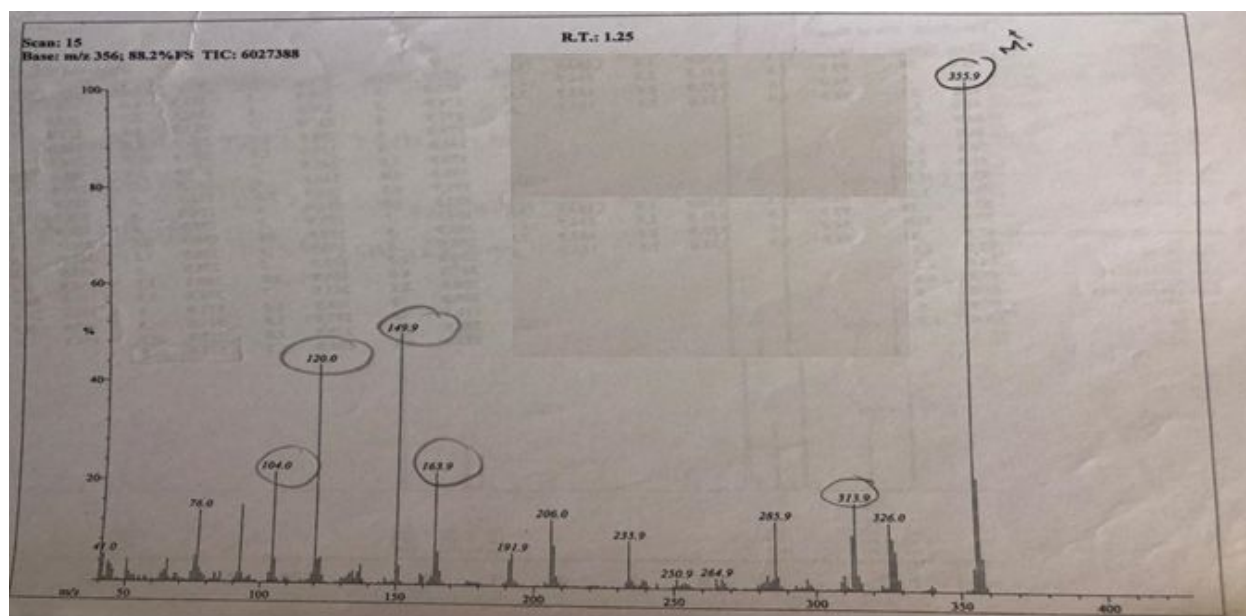

Figure-S2: EI-MS spectra of compound 5

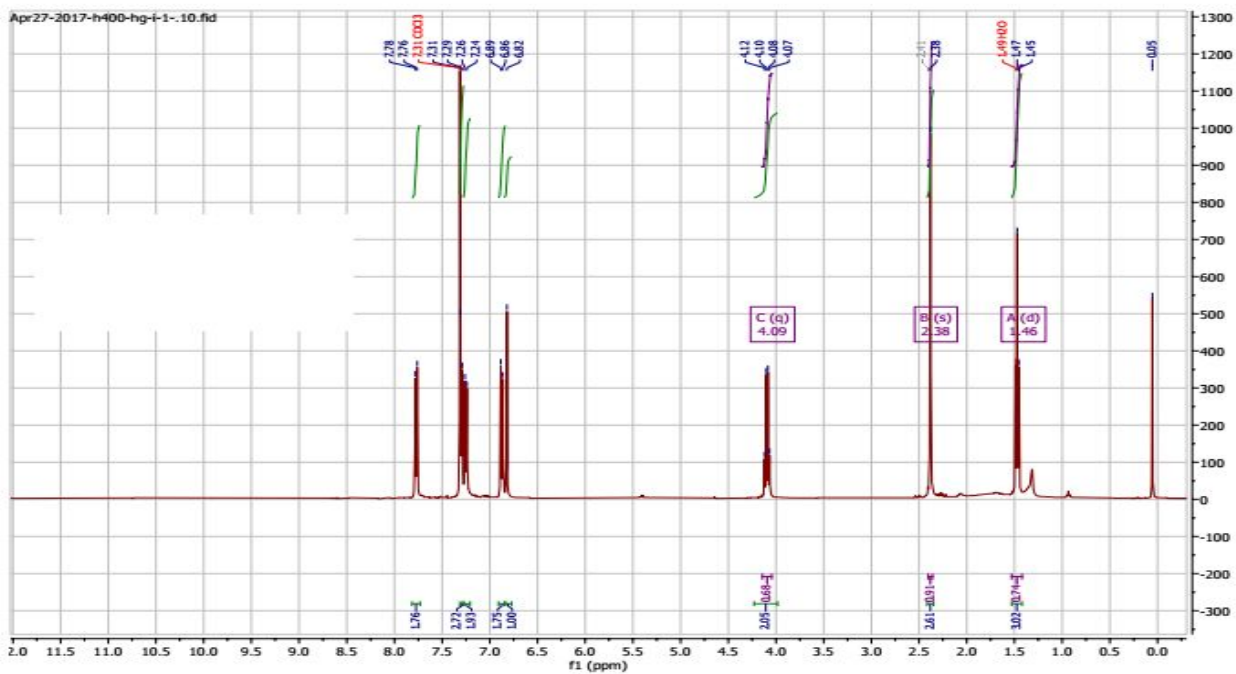

Figure-S3:  $^1\text{H-NMR}$  spectra of compound 6

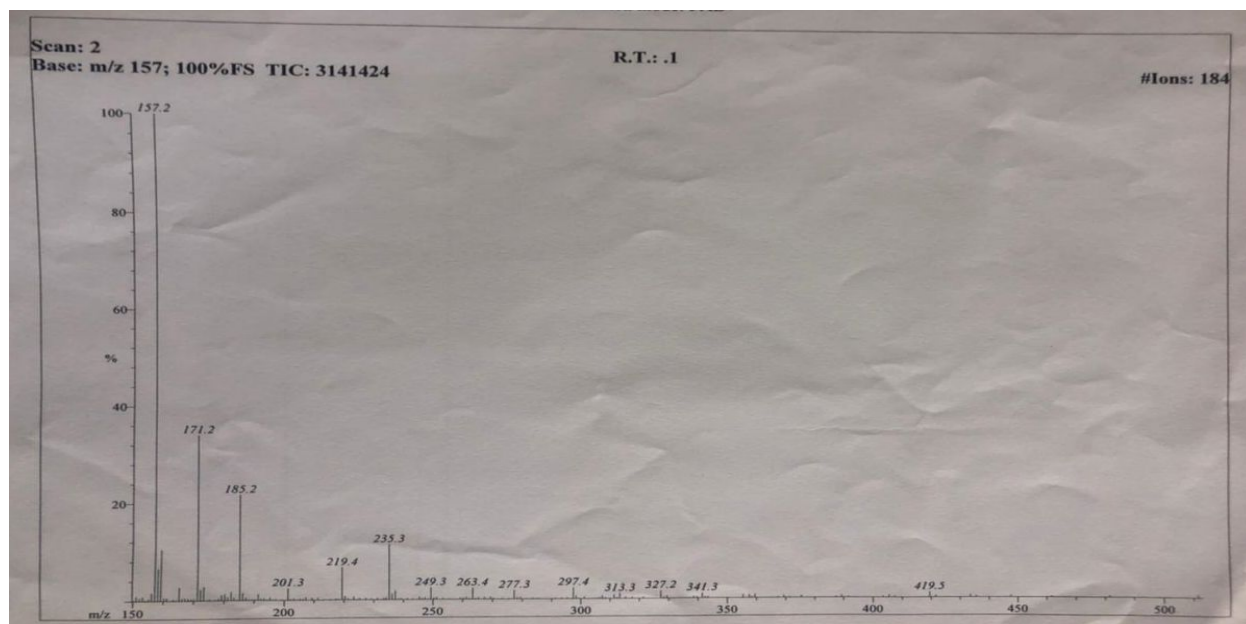

Figure-S4: EI-MS spectra of compound 6

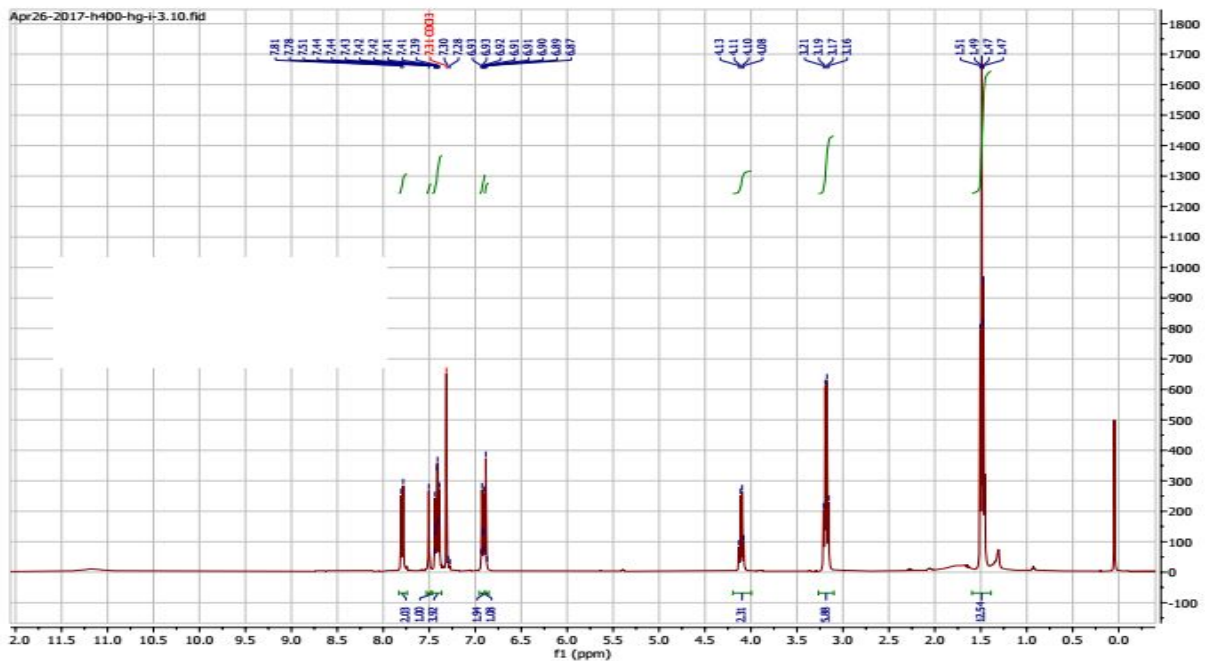

Figure-S5:  $^1\text{H-NMR}$  spectra of compound 7

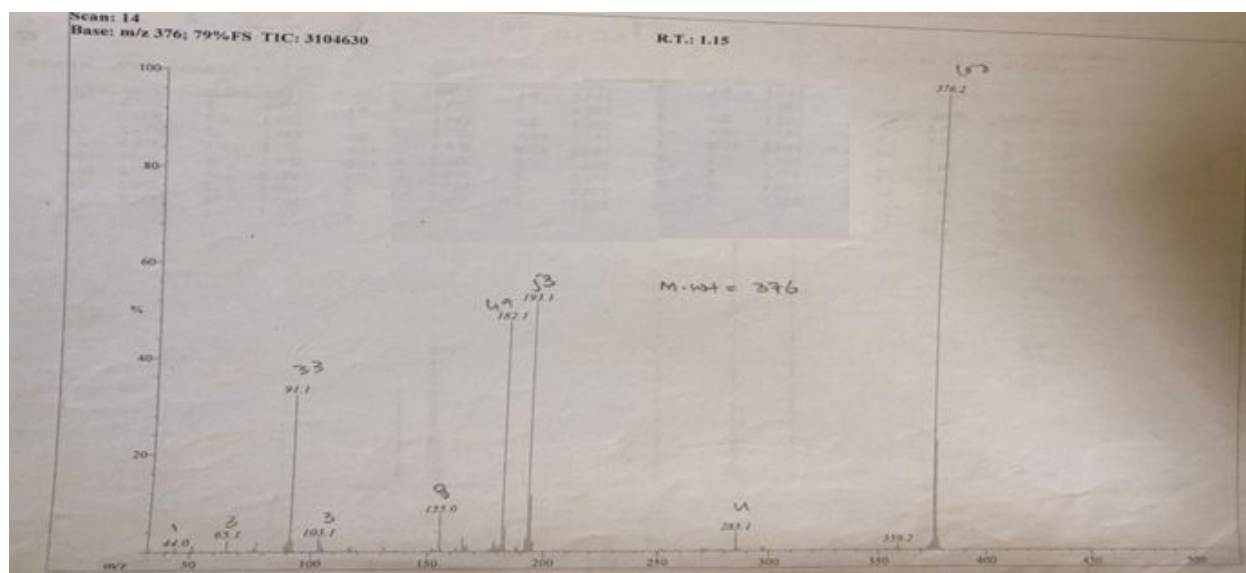

Figure-S6: EI-MS spectra of compound 7

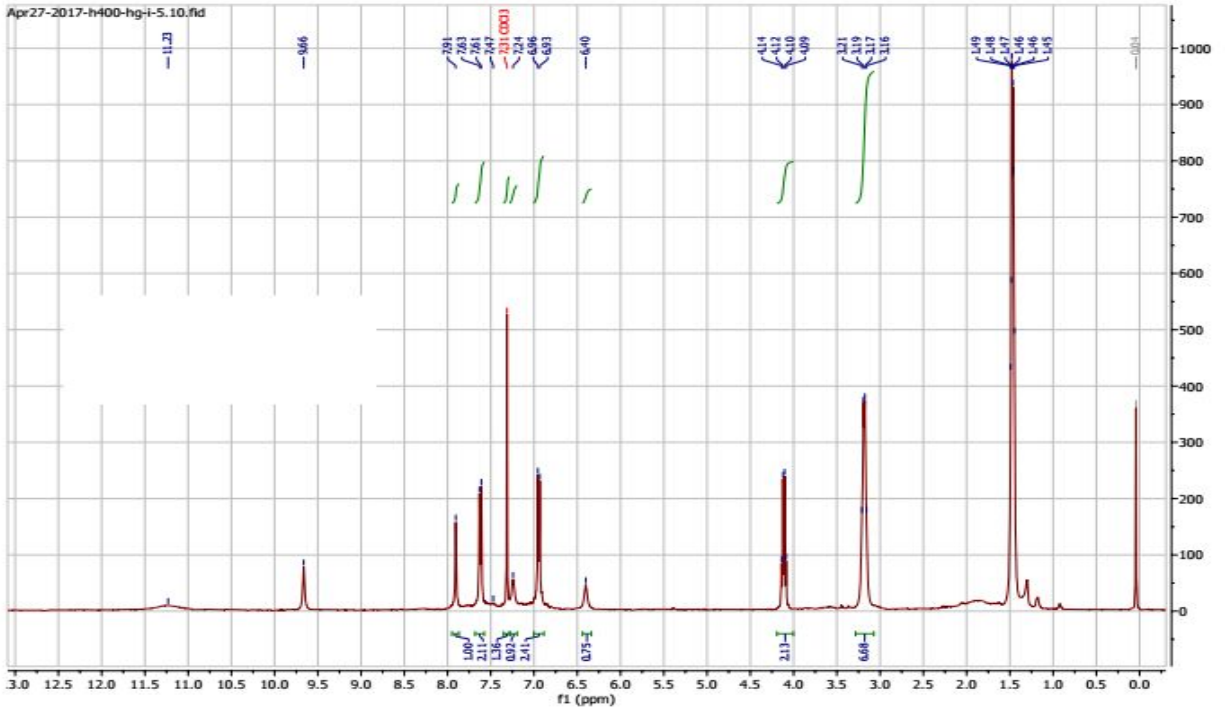

Figure-S7:  $^1\text{H-NMR}$  spectra of compound 9

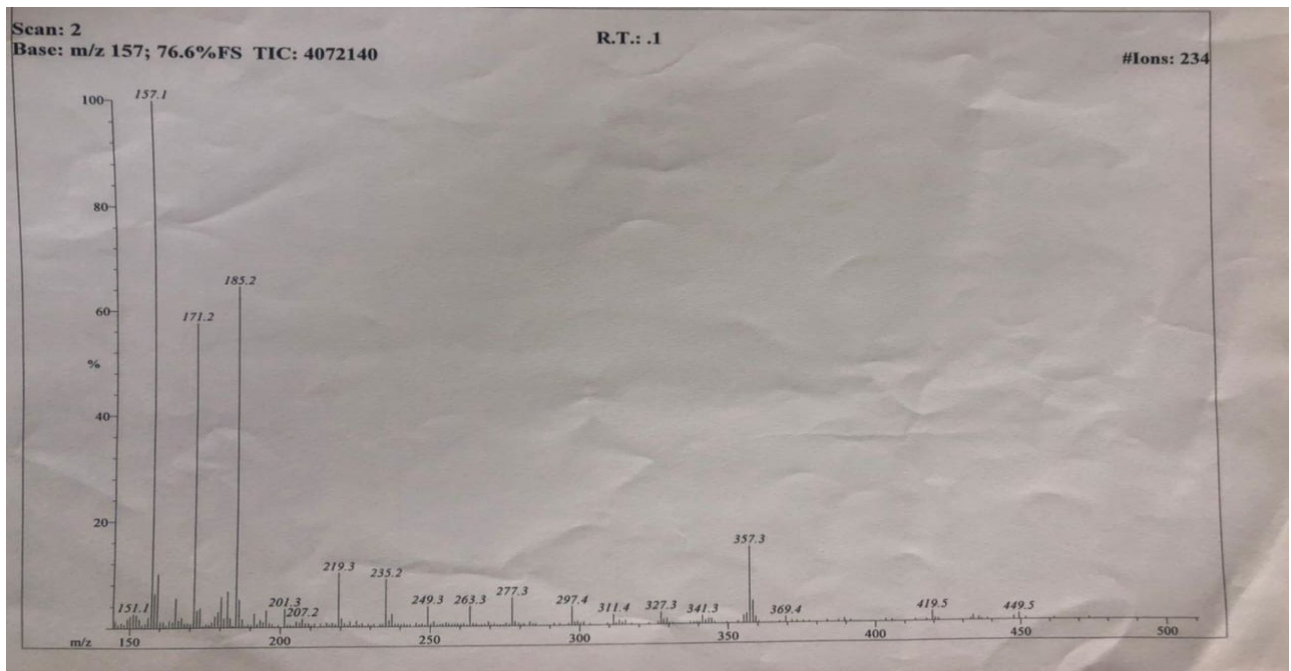

Figure-S8: EI-MS spectra of compound 9

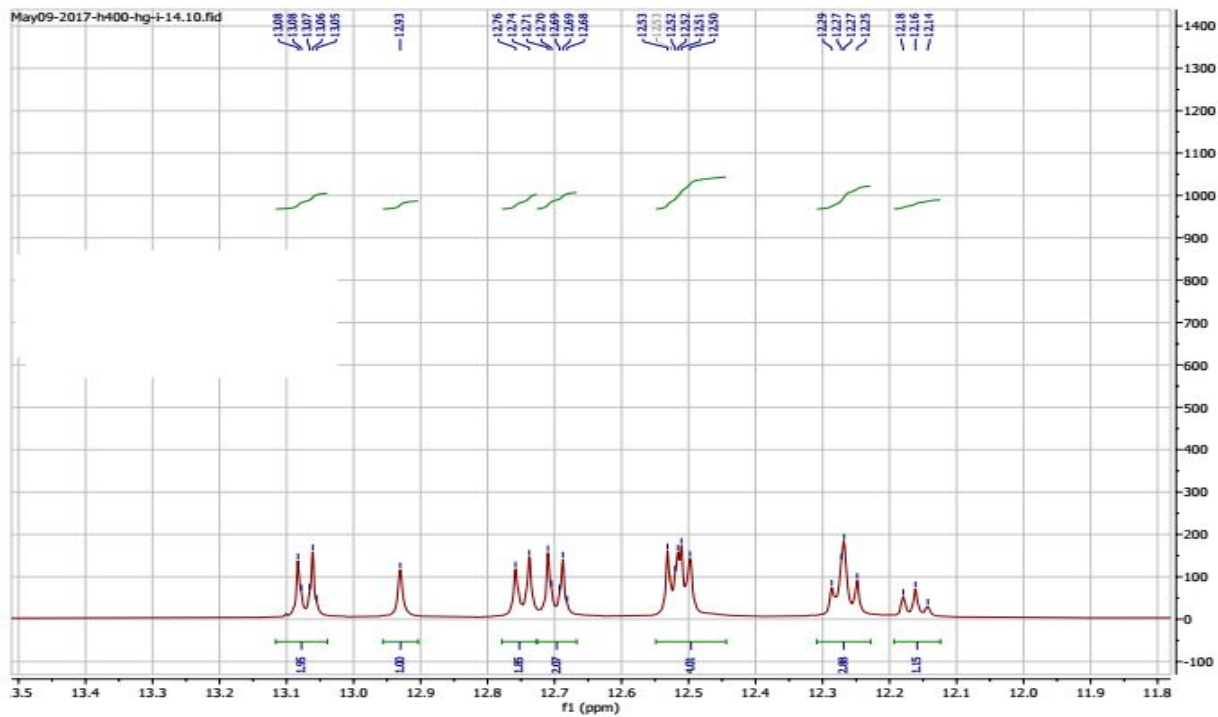

Figure-S9: <sup>1</sup>H-NMR spectra of compound 18

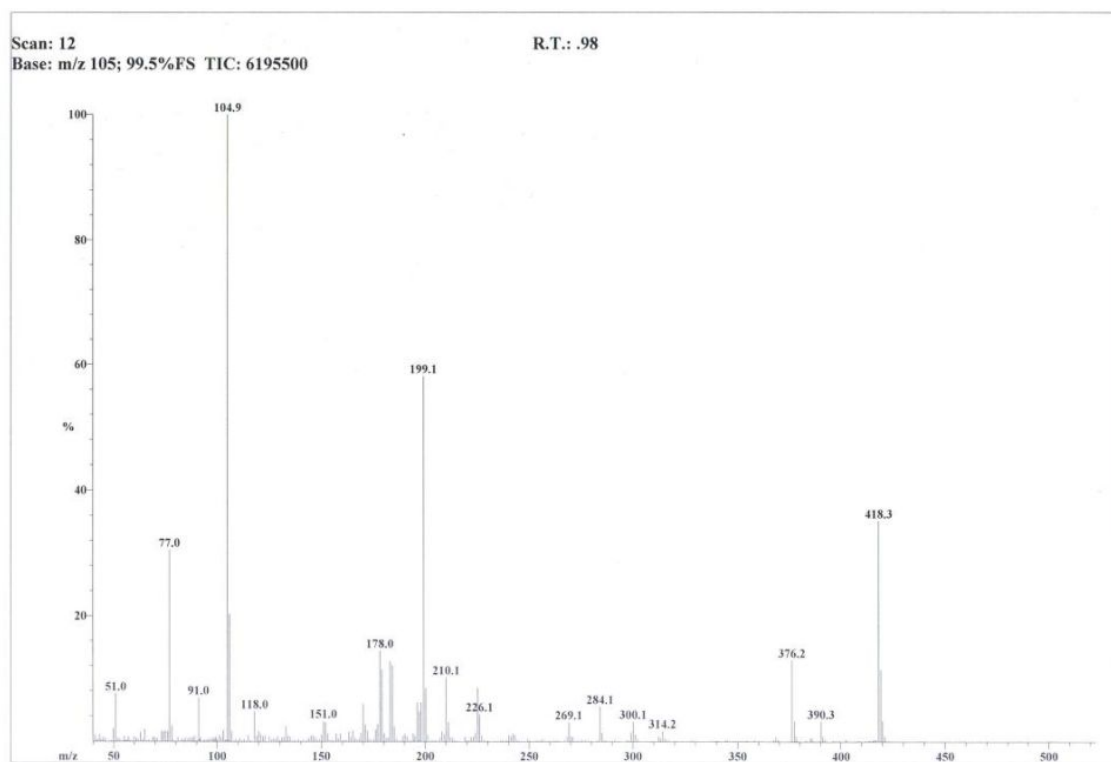

Figure-S10: EI-MS spectra of compound 18

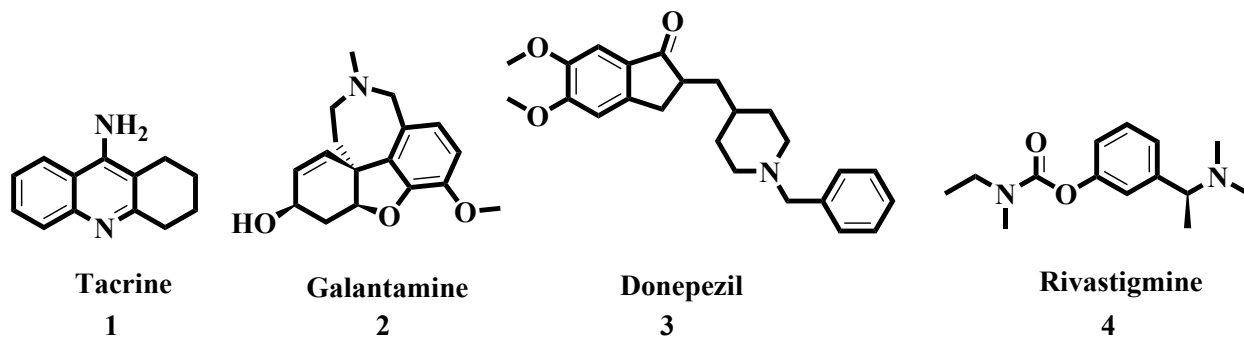

**Figure-S11:** Marketed available drugs as cholinesterase inhibitors

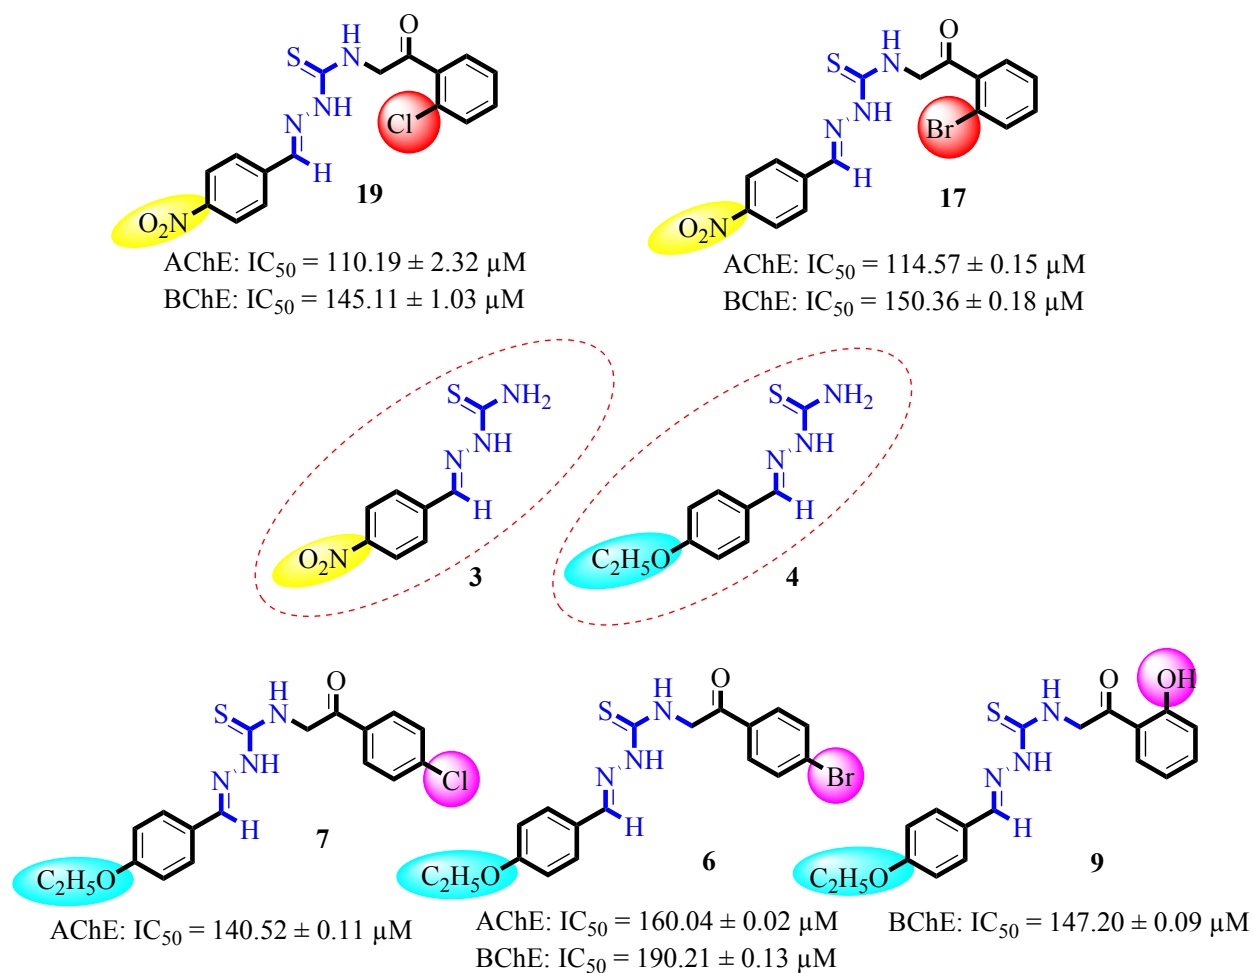

**Figure-S12:** The most active compounds of the series

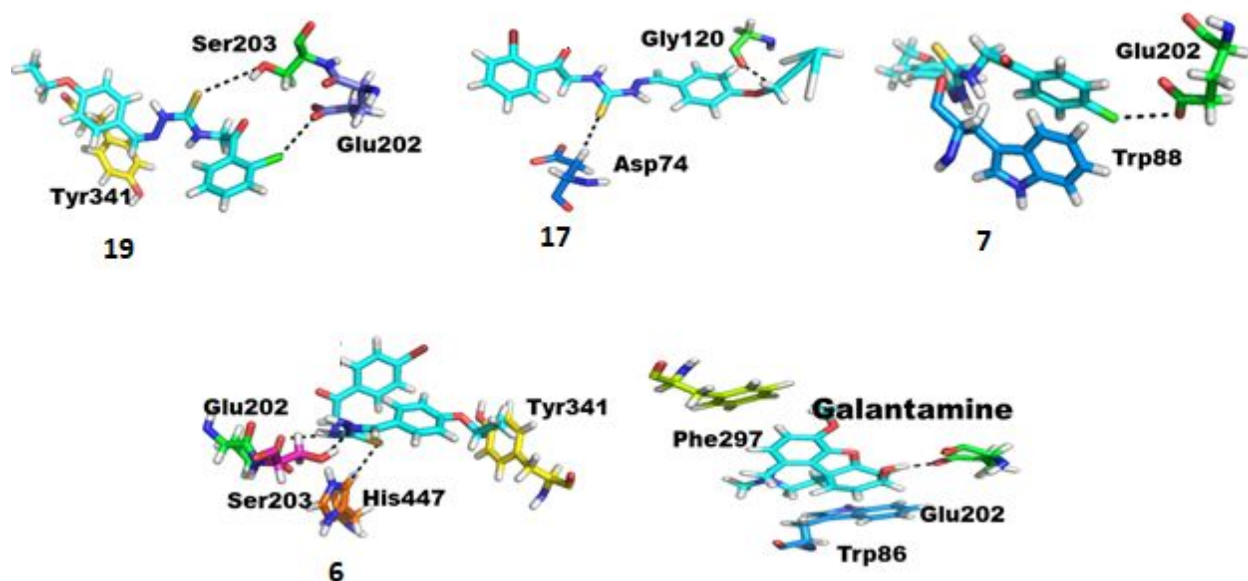

**Figure-S13:** Protein ligands interaction of acetyl cholinesterase with compounds 19, 17, 7, and 6 in comparison with galantamine.

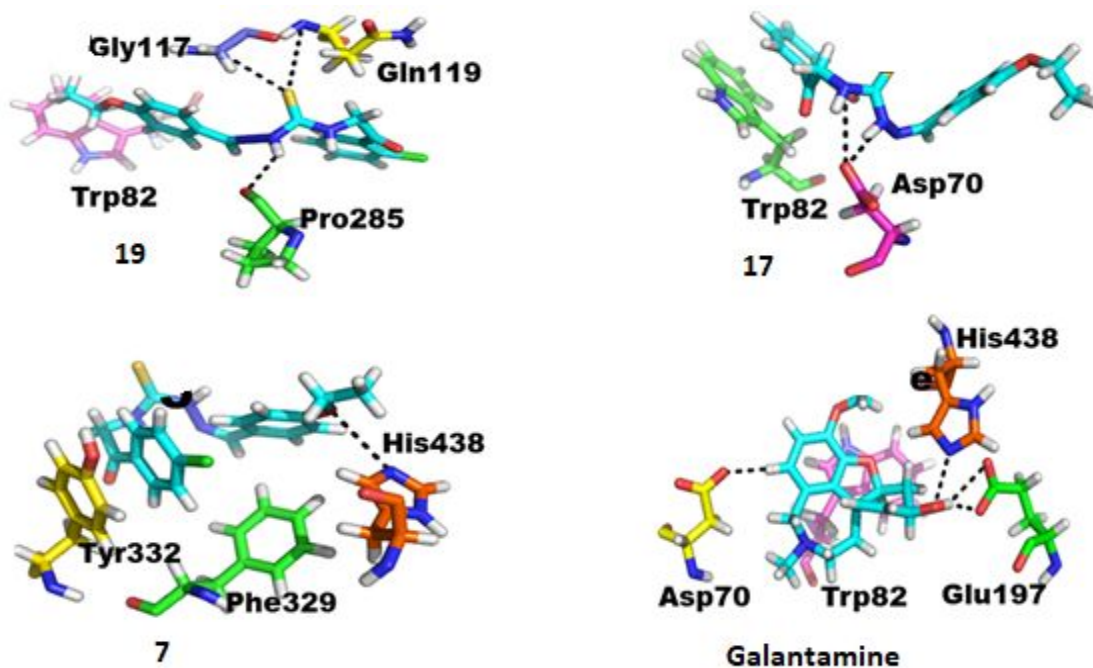

**Figure-S14:** Protein ligands interaction of butyrylcholinesterase with compounds 19, 17, and 7 in comparison with galantamine.



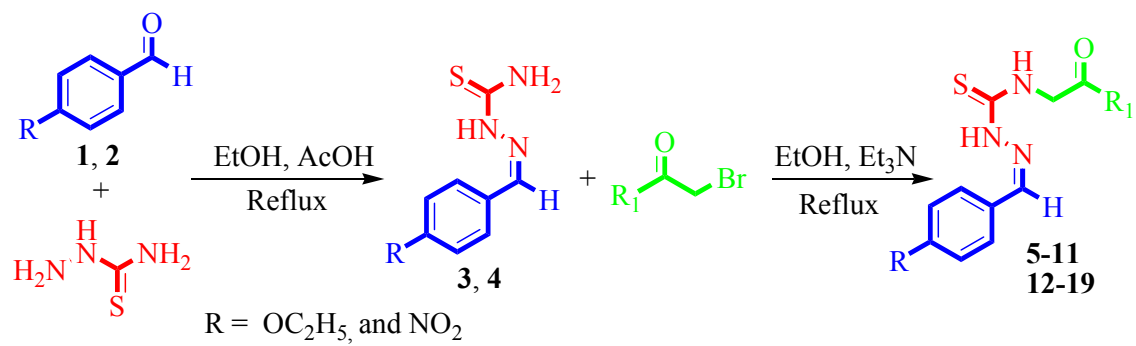

**Scheme-S1:** Thiosemicarbazone derivatives of *para* substituted benzaldehydes (5-19)

**Table-S1:** Acetyl cholinesterase (AChE) and butyrylcholinesterase (BChE) inhibitory activities of compounds (5-19).

| Compound | R                               | R <sub>1</sub>                                                                      | AChE          | BChE          |
|----------|---------------------------------|-------------------------------------------------------------------------------------|---------------|---------------|
| 5        | -OC <sub>2</sub> H <sub>5</sub> | 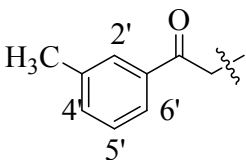   | 295.12 ± 0.12 | 300.20 ± 0.09 |
| 6        | -OC <sub>2</sub> H <sub>5</sub> |    | 160.04 ± 0.02 | 190.21 ± 0.13 |
| 7        | -OC <sub>2</sub> H <sub>5</sub> |    | 140.52 ± 0.11 | 334.08 ± 0.05 |
| 8        | -OC <sub>2</sub> H <sub>5</sub> |   | 220.22 ± 0.14 | 260.21 ± 0.23 |
| 9        | -OC <sub>2</sub> H <sub>5</sub> |  | 420.13 ± 0.08 | 147.20 ± 0.09 |
| 10       | -OC <sub>2</sub> H <sub>5</sub> |  | 275.71 ± 0.12 | 330.78 ± 0.10 |
| 11       | -OC <sub>2</sub> H <sub>5</sub> |  | 460.26 ± 0.14 | 500.61 ± 0.19 |
| 12       | -NO <sub>2</sub>                |  | 280.24 ± 0.21 | 260.38 ± 0.25 |

|                    |                  |                                                                                     |               |               |
|--------------------|------------------|-------------------------------------------------------------------------------------|---------------|---------------|
| 13                 | -NO <sub>2</sub> | 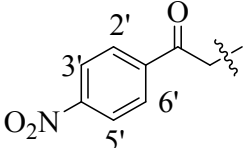   | 446.37 ± 0.17 | 326.39 ± 0.23 |
| 14                 | -NO <sub>2</sub> |    | 340.20 ± 0.26 | 425.15 ± 0.19 |
| 15                 | -NO <sub>2</sub> |    | 200.41 ± 0.21 | 270.26 ± 0.19 |
| 16                 | -NO <sub>2</sub> |    | 320.36 ± 0.33 | 306.33 ± 0.28 |
| 17                 | -NO <sub>2</sub> |   | 114.57 ± 0.15 | 150.36 ± 0.18 |
| 18                 | -NO <sub>2</sub> |  | 420.03 ± 0.13 | 212.25 ± 0.09 |
| 19                 | -NO <sub>2</sub> |  | 110.19 ± 2.32 | 145.11 ± 1.03 |
| <b>Galantamine</b> |                  |                                                                                     | 104.5 ± 1.20  | 156.8 ± 1.50  |

Standard positive control Galanthamine was used, Data is mean ± SEM<sup>a</sup>.

**Table-S2:** Docking scores of compounds **5-19** against Acetyl cholinesterase (AChE).

| <b>Compound ID</b> | <b>Docking Score</b> |
|--------------------|----------------------|
| 05                 | -5.4391              |
| 06                 | -7.5424              |
| 07                 | -5.7615              |
| 08                 | -5.3486              |
| 09                 | -5.1265              |
| 10                 | -5.8769              |
| 11                 | -5.1683              |
| 12                 | -6.3524              |
| 13                 | -5.6579              |
| 14                 | -6.7932              |
| 15                 | -5.5194              |
| 16                 | -6.1582              |
| 17                 | -7.3860              |
| 18                 | -5.8361              |
| 19                 | -7.7764              |
| Galantamine        | -6.6663              |

**Table-S3:** Docking scores of compounds **5-19** against Butyryl cholinesterase (BChE).

| <b>Compound ID</b> | <b>Docking Score</b> |
|--------------------|----------------------|
| 05                 | -5.3645              |
| 06                 | -6.8756              |
| 07                 | -5.6658              |
| 08                 | -5.0978              |
| 09                 | -6.7572              |
| 10                 | -5.6794              |
| 11                 | -5.3355              |
| 12                 | -5.8916              |
| 13                 | -5.3376              |
| 14                 | -6.4673              |
| 15                 | -5.3462              |
| 16                 | -5.9987              |
| 17                 | -7.1376              |
| 18                 | -5.6794              |
| 19                 | -6.8956              |
| Galantamine        | -6.5698              |
